# Supplementary material for: Antifungal Liposomes Directed by Dectin-2 Offer a Promising Therapeutic Option for Pulmonary Aspergillosis
Source: PubMed Central journal article supplement (PMC8545082; doi:10.1128/mbio.00030-21), 2021-02-23

Supplemental Figure 2

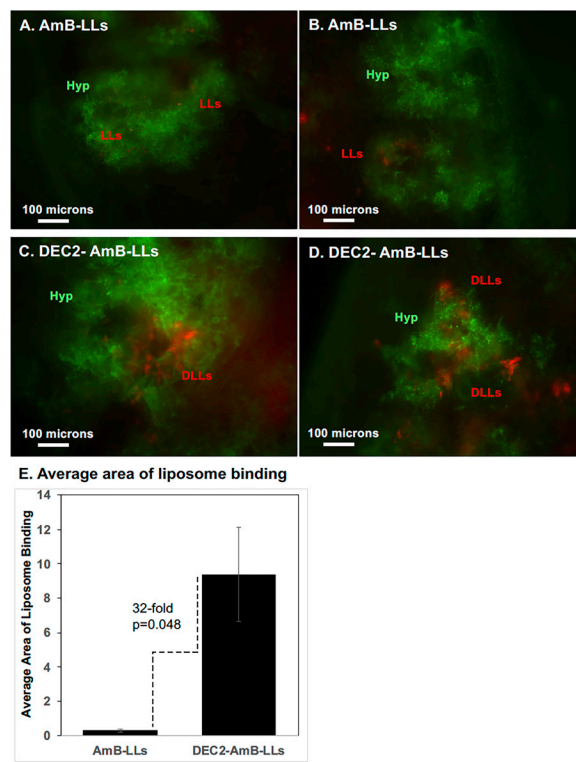

Supplement: mbio.00030-21-sf002.pdf [file mbio.00030-21-sf002.pdf]
